# Supplementary material
Source: PubMed Central journal article supplement (PMC4195783)
Supplement: embj0033-1869-sd1.pdf [file embj0033-1869-sd1.pdf]

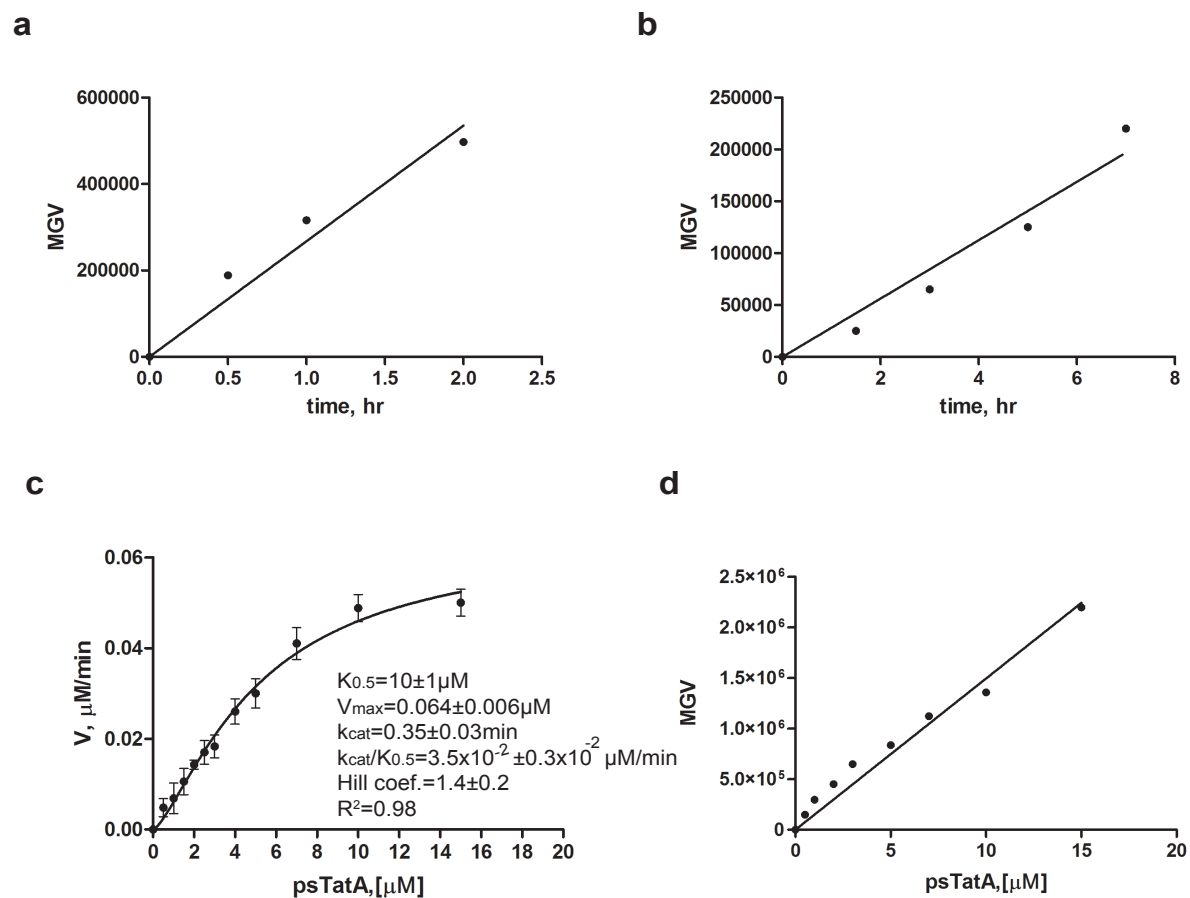

**Supplemental Figure S1.** The time course of AarA **(a)** and ecGlpG **(b)** mediated cleavage of psTatA, showing the linear relationship between the product formation (detected from the western blots and shown in mean Grey Values (MGV)) and the time of reaction. **(c)** Hill plot of psTatA cleavage by AarA (time of reaction is 1hr)(n=2, mean±SD), demonstrating the similar kinetic parameters as shown in Figure 1 (time of reaction of 15 min). **(d)** The linear proportionality between chemiluminescent signals detected from the western blot and the amount of psTatA used in the kinetic assay. Anti-His antibodies were used to visualize the psTatA bands and chemiluminescence was recorded by ImageQuant LAS 4000 Analyzer.
