# Supplementary material
Source: PubMed Central journal article supplement (PMC4195783)
Supplement: embj0033-1869-sd2.pdf [file embj0033-1869-sd2.pdf]

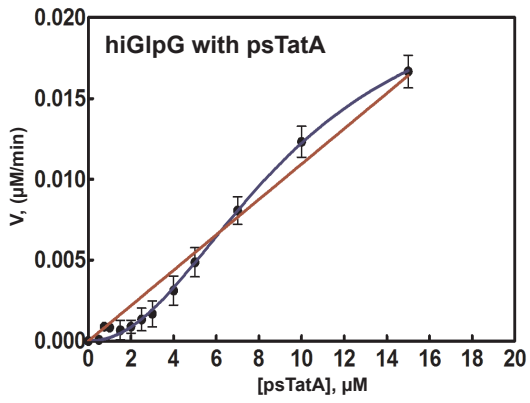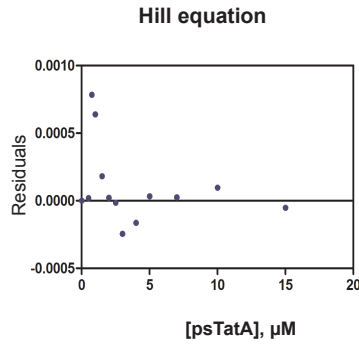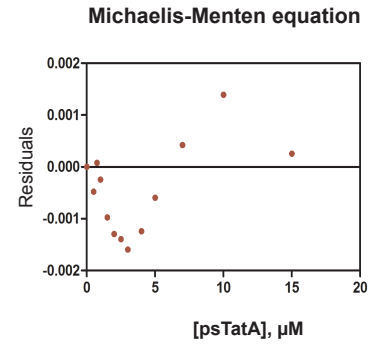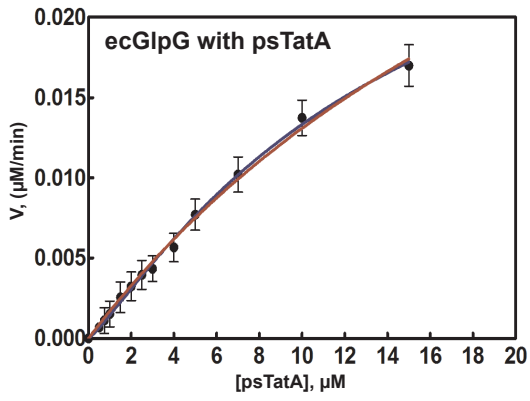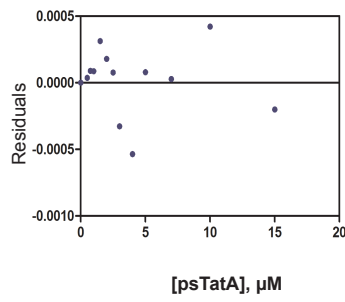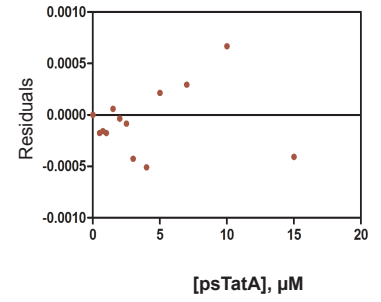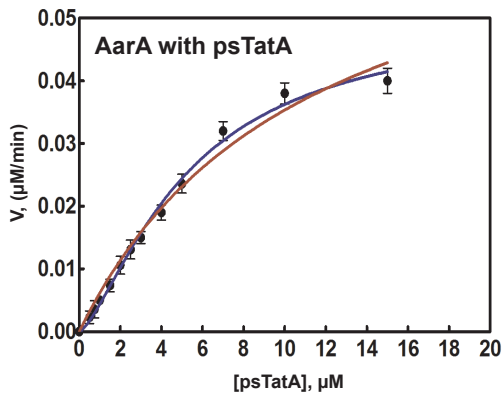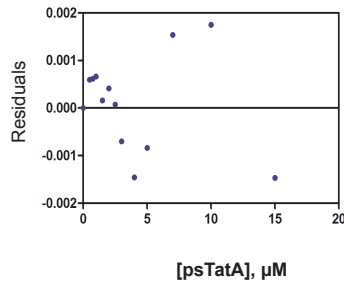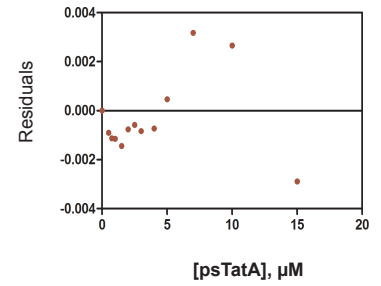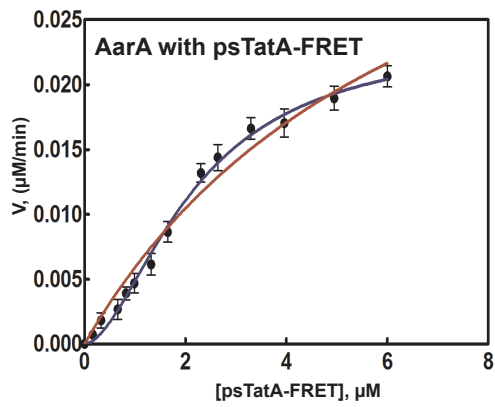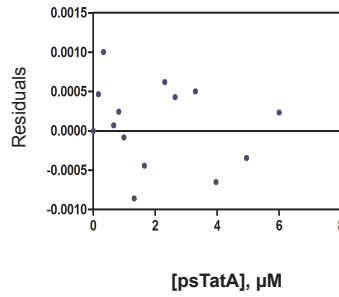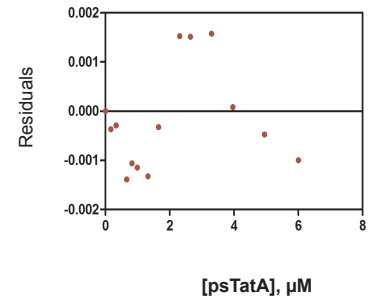

**Supplemental Figure S2. Overlays of Michaelis-Menten and Hill plots for kinetic data of three studied rhomboids.** Overlays of Michaelis-Menten and Hill equation fits for rhomboid kinetics assays with psTatA and psTatA-FRET are provided along with residual plots to validate the accuracy of used kinetic models. When curves are properly fit, on the X-axis residuals are expected to be randomly distributed throughout the variable with no drift, i.e. no obvious pattern or long runs of positive or negative values. It is also best for the residuals to have small relative magnitudes.
