# Supplementary material
Source: PubMed Central journal article supplement (PMC4195783)
Supplement: embj0033-1869-sd6.pdf [file embj0033-1869-sd6.pdf]

**a**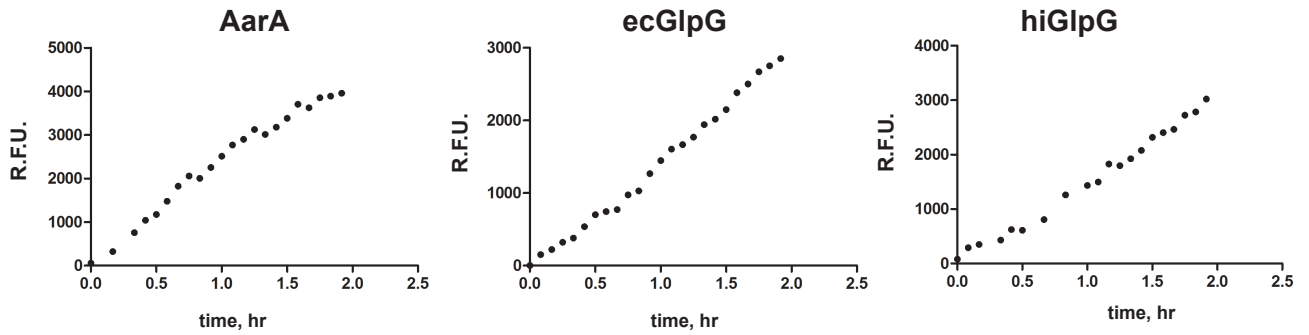**b**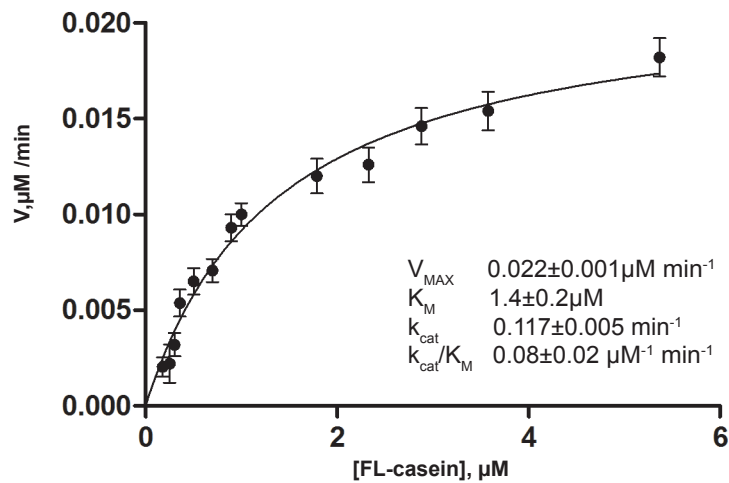

**Supplemental Figure S6. Monomeric form of rhomboids is active with FL-casein.** Rhomboid purification, as well as the activity measurements, were carried out in 0.2% DM to obtain the monomeric state of the enzyme. **(a)** The time course of FL-casein cleavage by monomeric forms of AarA, ecGlpG and hiGlpG. **(b)** Michaelis-Menten graph of FL-casein cleavage by monomeric form of ecGlpG. 0.18  $\mu\text{M}$  of rhomboid protease was incubated with 0.1-5.8  $\mu\text{M}$  of FL-casein at 37°C for 2 hr.
