# Supplementary material
Source: PubMed Central journal article supplement (PMC4195783)
Supplement: embj0033-1869-sd7.pdf [file embj0033-1869-sd7.pdf]

**a**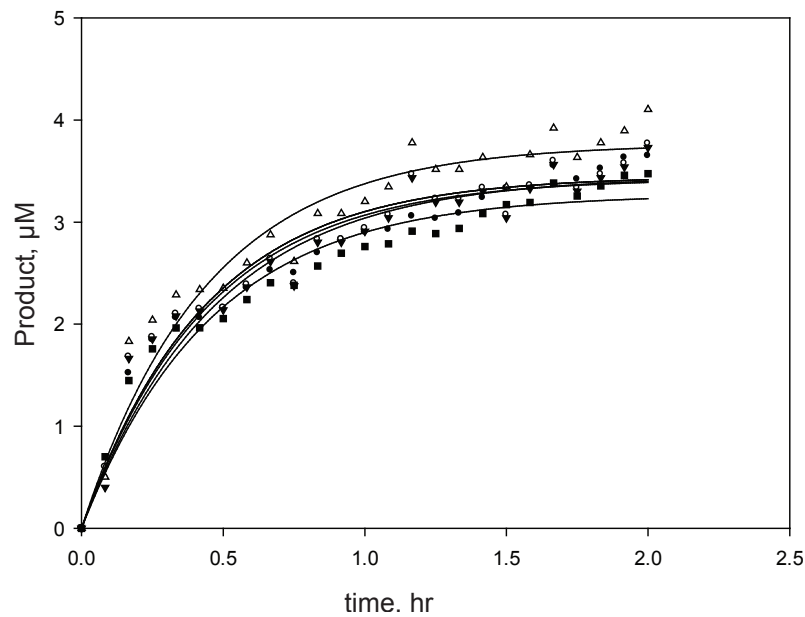**b**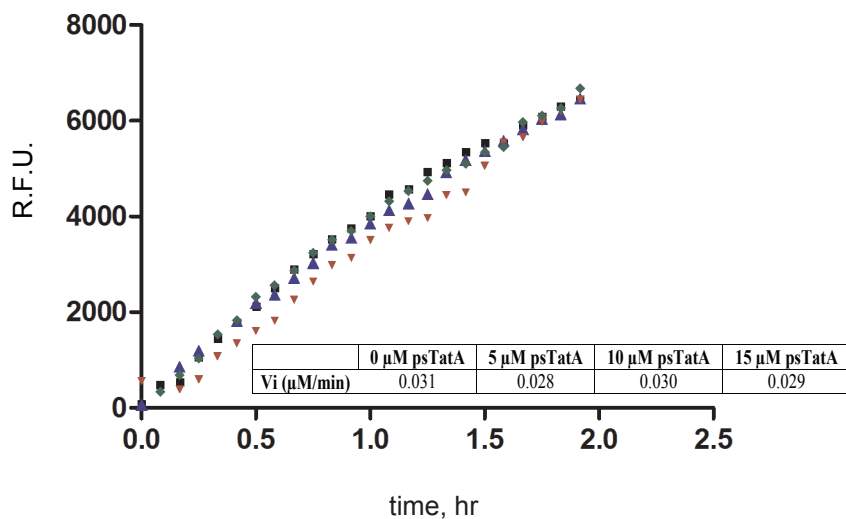

**Supplemental Figure S7. (a)** Competitive binding studies of hiGlpG-mediated FL-casein cleavage in the presence of different concentrations of psTatA. Plots show no effect of psTatA on FL-casein cleavage. **(b)** Competitive binding studies of monomeric AarA-mediated cleavage of FL-casein in the presence of 5  $\mu\text{M}$  (blue), 10  $\mu\text{M}$  (red), 15  $\mu\text{M}$  (green) or no psTatA (black). The protease reaction between AarA (0.18  $\mu\text{M}$ ) with FL-casein (3  $\mu\text{M}$ ) was performed in activity buffer containing 0.2% DM in the presence of different concentrations of psTatA. The reaction was started with the protease. Fluorescence emission at 513 nm was measured at 37°C every 5 min for 2 hr in a fluorescence microplate reader with an excitation wavelength of 503 nm. Fluorescence detection of each substrate concentration in the presence of corresponding psTatA concentration without enzyme was used as a negative control (n=2). The table represents the initial velocities of FL-casein cleavage in the presence of different concentrations of psTatA.
